# Supplementary material for: Dusty trades and associated rheumatoid arthritis in a population-based study in the coal mining counties of Appalachia
Source: HighWire-hosted journal article supplement (doi:10.1136/oemed-2021-107899), 2022-01-05
Supplement: oemed-2021-107899supp001_data_supplement.pdf [file oemed-2021-107899supp001_data_supplement.pdf]

**Supplemental Table 1 - Arthritis conditions associated with coal and silica exposure, adjusted for smoking and age using generalized estimating equations to account for clustering by survey year**

|                            | <b>Arthritis<br/>(any type)<br/>(n=2981)</b> | <b>Non-RA arthritis<br/>(excludes RA)<br/>(n=2641)</b> | <b>RA*<br/>(excludes non-RA)<br/>(n=1607)</b> |
|----------------------------|----------------------------------------------|--------------------------------------------------------|-----------------------------------------------|
| Coal and Silica exposure   | Odds Ratios (95% Confidence Intervals)       |                                                        |                                               |
| Coal (+/- silica exposure) | 2.3 (2.2, 2.3)                               | 2.1 (2.0, 2.1)                                         | 3.5 (3.4, 3.7)                                |
| Silica exposure only       | 2.0 (1.7, 2.3)                               | 1.8 (1.5, 2.1)                                         | 3.2 (3.1, 3.4)                                |
| Neither                    | referent                                     | referent                                               | referent                                      |
| Age (per year)             | 1.020 (1.014, 1.026)                         | 1.019 (1.016, 1.023)                                   | 1.019 (1.005, 1.033)                          |
| Cigarette Smoking          |                                              |                                                        |                                               |
| Current/recent smoker      | 1.3 (1.1, 1.5)                               | 1.3 (1.1, 1.4)                                         | 1.5 (1.16, 1.97)                              |
| Former smoker              | 1.1 (1.0, 1.2)                               | 1.0 (0.9, 1.1)                                         | 1.8 (1.73, 1.82)                              |
| Never smoked               | referent                                     | referent                                               | referent                                      |

\* RA definition based on report of doctor's diagnosis of RA, plus treatment with glucocorticoids.

Recent smokers include those who stopped within past 3 years

**Supplemental Table 2 - Rheumatoid arthritis (more specific definition) associated with coal, silica, and ergonomic exposures, adjusted for smoking, and age (2019 sample only)**

| Risk Factors                                            | RA (including treatment with both glucocorticoids & DMARDs)<br>(n=899)<br>OR (95% CI) |
|---------------------------------------------------------|---------------------------------------------------------------------------------------|
| Coal and/or silica exposure                             |                                                                                       |
| No exposure to coal mining or other occupational silica | referent                                                                              |
| Coal mining exposure                                    | 3.0 (1.36, 6.4)                                                                       |
| Silica exposure from non-coal occupations only          | 2.9 (1.42, 6.0)                                                                       |
| Ergonomic hazard score (referent category = 0 points)   |                                                                                       |
| 1 point                                                 | 1.6 (0.55, 4.6)                                                                       |
| 2-3 points                                              | 2.3 (0.93, 5.6)                                                                       |
| 4-5 points                                              | 4.1 (1.63, 10.3)                                                                      |

DMARD = Disease Modifying Anti-Rheumatic Drug

OR=Odds Ratio; CI = Confidence Interval

Model controls for variables shown plus age, smoking (never, former, current/recent).

Model excludes respondents who report arthritis not meeting the more specific definition of glucocorticoids and DMARDs (overall prevalence of RA by this definition = 3% (95% CI 2-4%).

### Supplemental Figure Legend

Supplemental Figure 1. Flowchart of sample inclusion for 2017 and 2019 surveys.
