# Supplementary material for: Dusty trades and associated rheumatoid arthritis in a population-based study in the coal mining counties of Appalachia
Source: HighWire-hosted journal article supplement (doi:10.1136/oemed-2021-107899), 2022-01-05
Supplement: oemed-2021-107899supp002_data_supplement.pdf [file oemed-2021-107899supp002_data_supplement.pdf]

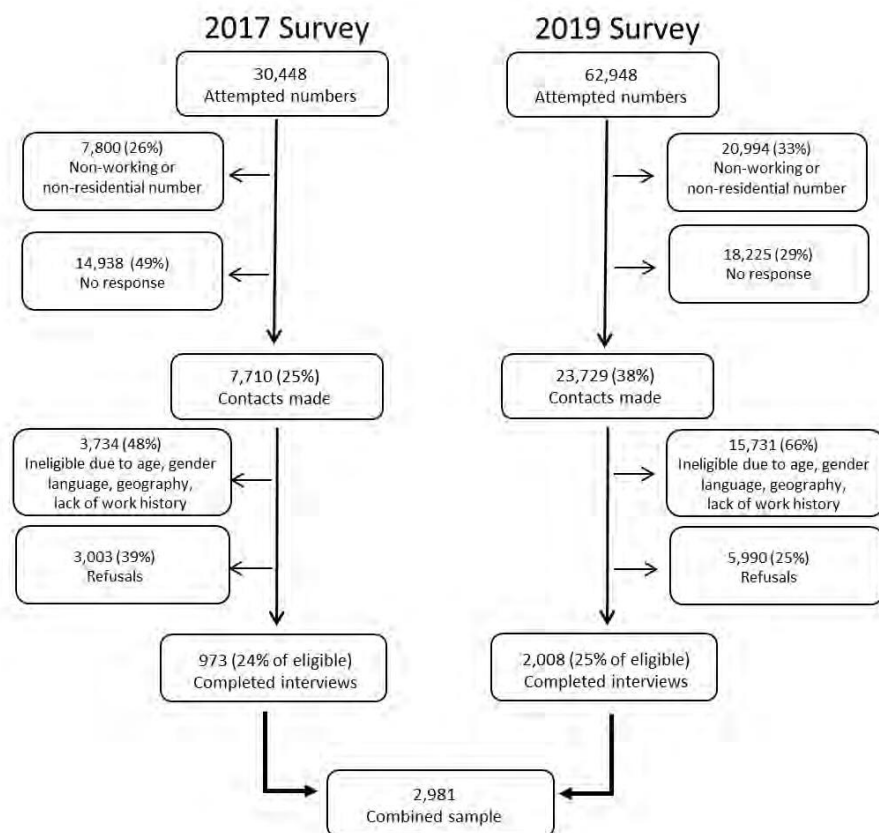

Supplemental Figure 1. Flowchart of sample inclusion for 2017 and 2019 surveys.
